# Supplementary material
Source: MDPI journal article supplement (https://www.mdpi.com/2079-9284/7/4/93)
Supplement: s1 [file s1]

Supplementary Materials

# Hidden Formaldehyde Content in Cosmeceuticals Containing Preservatives that Release Formaldehyde and Their Compliance Behaviors: Bridging the Gap between Compliance and Local Regulation

Ammar Abdulrahman Jairoun <sup>1,2,\*</sup>, Sabaa Saleh Al-Hemyari <sup>1,3</sup>, Moyad Shahwan <sup>4,5</sup>, Sa'ed H. Zyoud <sup>6,7</sup> and Akram Ashames <sup>4</sup>

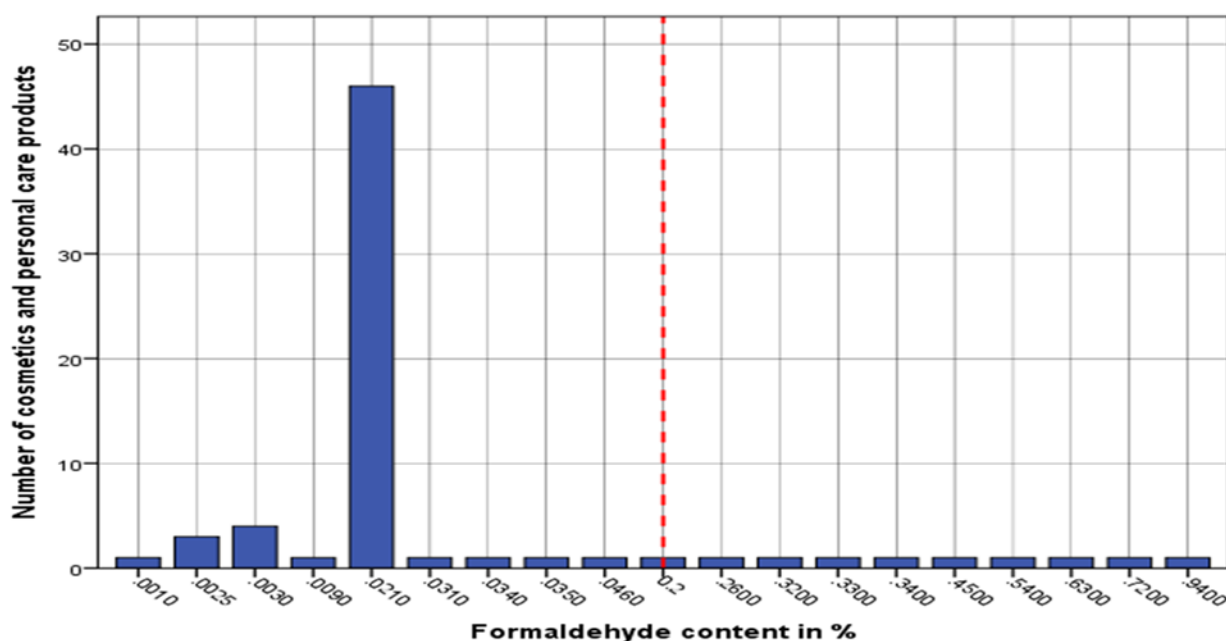

**Figure S1.** Histogram of the estimated formaldehyde content (%) for cosmetics and personal care products (n = 69). The vertical dashed line is the maximum allowable limit of the formaldehyde according to EU regulations.

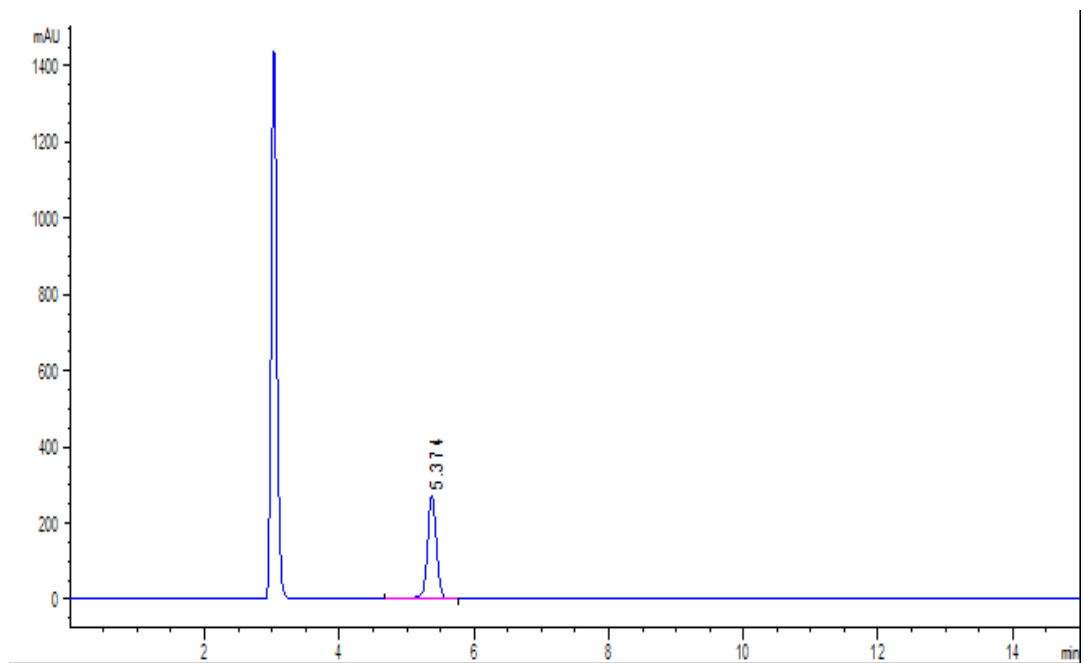

**Figure S2.** Chromatogram of the standard at 20 mg/L.

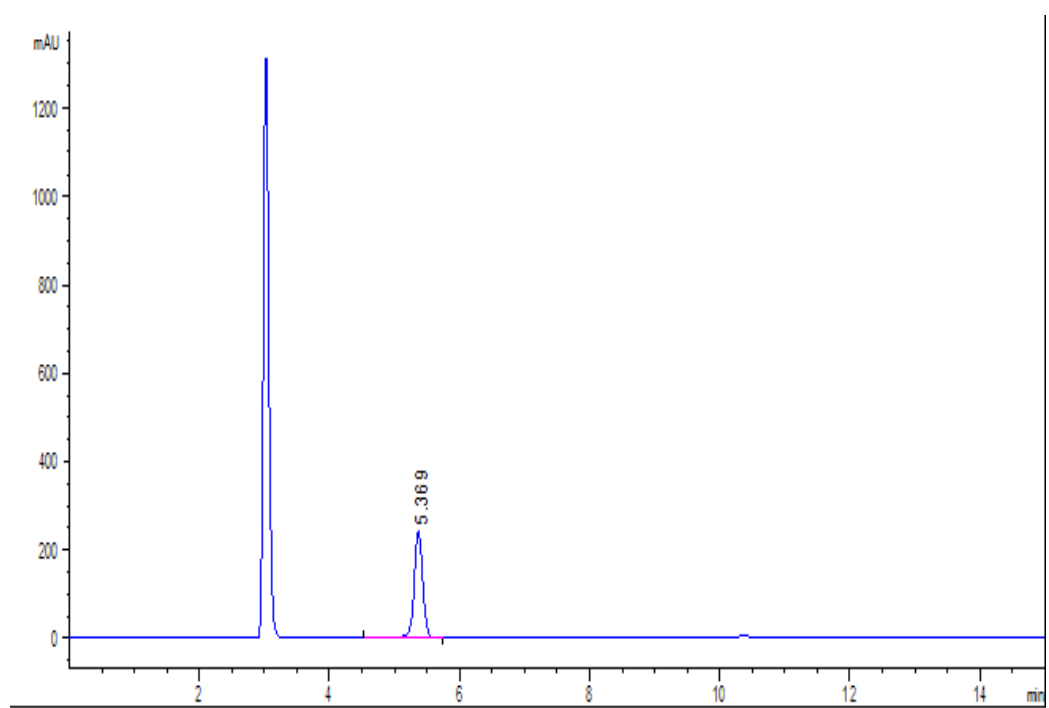

**Figure S3.** Chromatogram of the Sample spike at 20 mg/L.

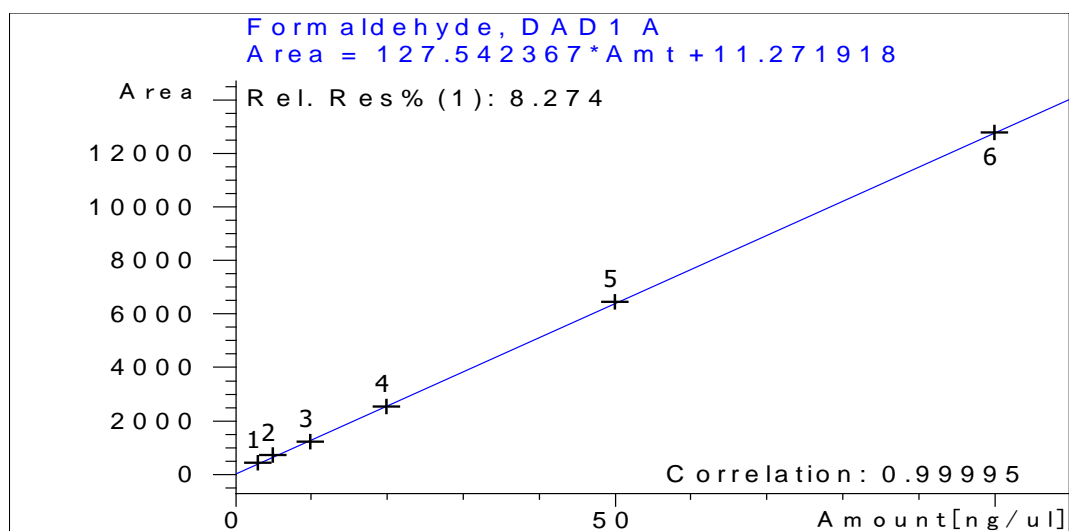

Figure S4. Linearity plot of formaldehyde.
